# Supplementary material
Source: publisher figshare collection journal article supplement (https://frontiersin.figshare.com/ndownloader/files/12981440)

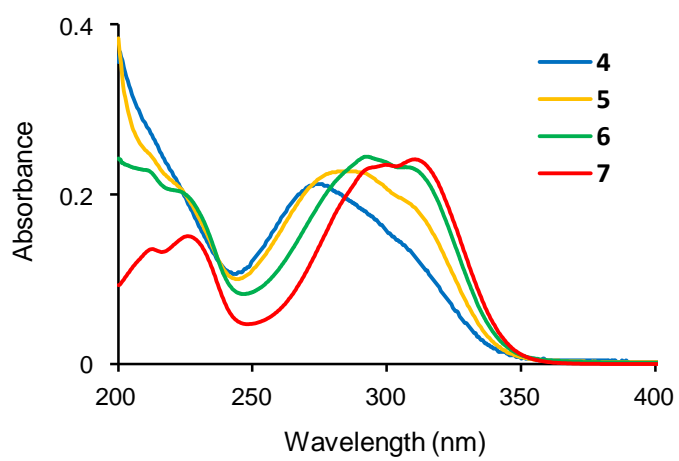

Figure S7. UV spectrum of tri-*p*-coumaroylspermidine isomers (**4–7**)

Supplement: Supplementary file 1 [file 12981440]
